# Supplementary material for: Unexpected enhancement of ozone exposure and health risks during National Day in China
Source: Copernicus journal article supplement (doi:10.5194/acp-2020-1302), 2021-02-02
Supplement: Supplementary file 1 [file acp-2020-1302-supplement.pdf]

*Supplement of*

## **Unexpected enhancement of ozone exposure and health risks during the Chinese National Day Holiday**

Peng Wang et al.

Correspondence to: Yanli Zhang ([zhang\\_yl86@gig.ac.cn](mailto:zhang_yl86@gig.ac.cn))

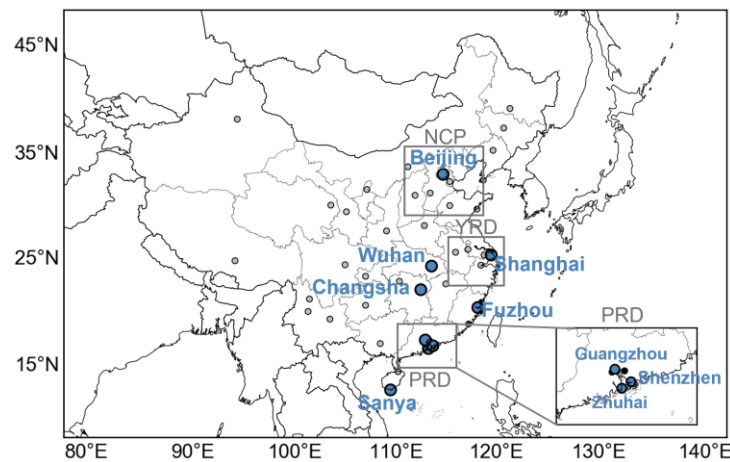

**Figure S1** Model domain and city locations. Blue dots represent nine key cities and grey dots refer to other cities.

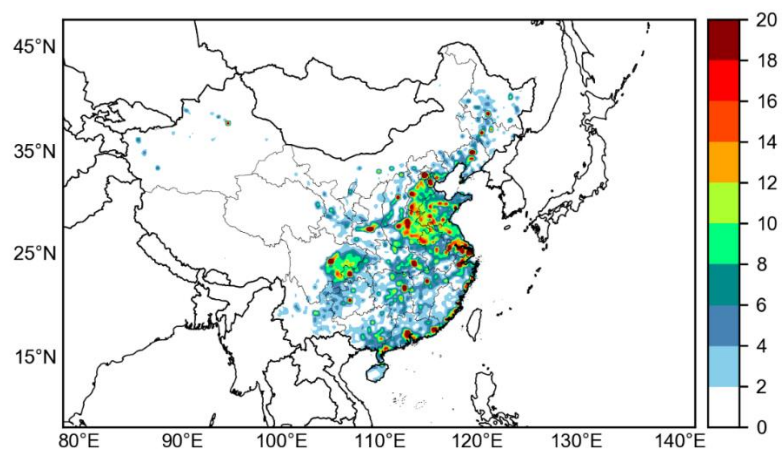

**Figure S2** Chinese population ( $\times 10^5$ ) from China's Sixth Census data

(<http://www.stats.gov.cn/tjsj/pcsj/rkpc/6rp/indexch.htm>).

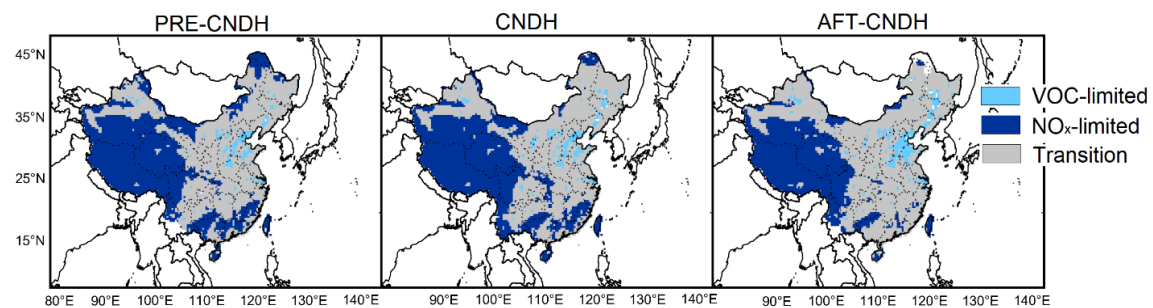

**Figure S3** O<sub>3</sub> sensitivity regimes in PRE-CNDH, CNDH, and AFT-CNDH in 2018.

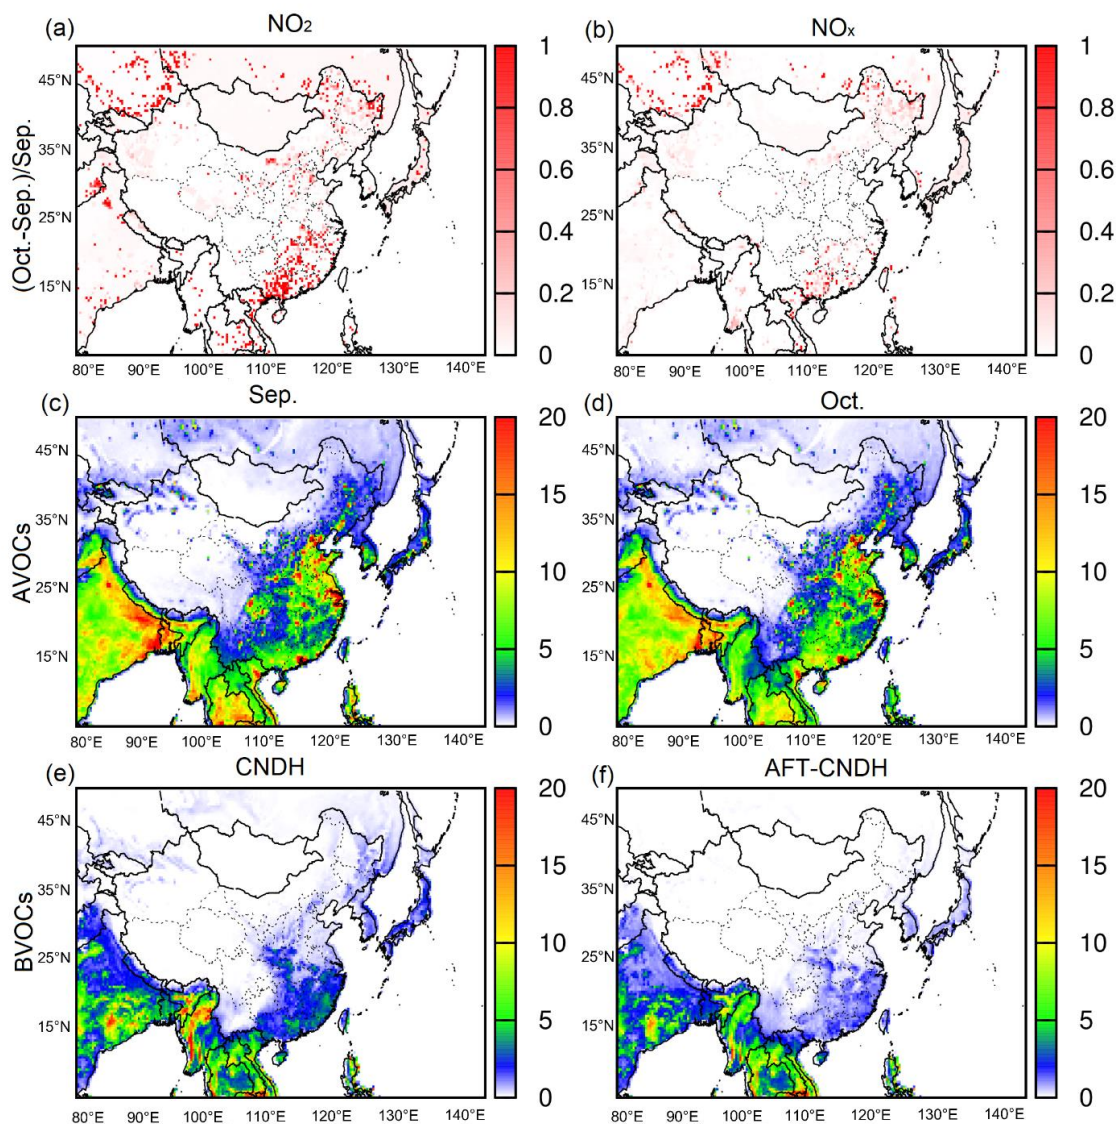

**Figure S4** Changes of emissions in relative differences ( $((\text{Oct.}-\text{Sep.})/\text{Sep.})$ ) of (a)  $\text{NO}_2$  and (b)  $\text{NO}_x$ . Averaged emissions rates of AVOCs from MEIC emission inventory in (c) September and (d) October. Averaged BVOC emission rates from the MEGAN model in (e) CNDH and (f) AFT-CNDH. Units are moles/s for (c)-(f).

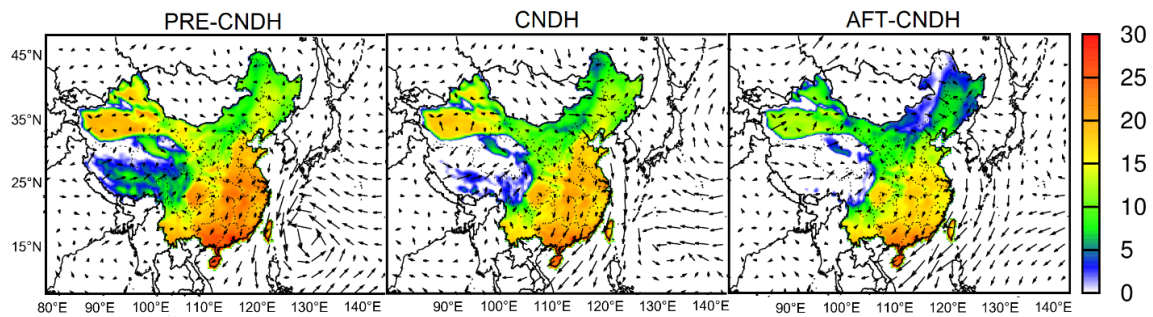

**Figure S5** Averaged temperature (in °C) in PRE-CNDH, CNDH, and AFT-CNDH, respectively.

The black arrows show the wind vectors.

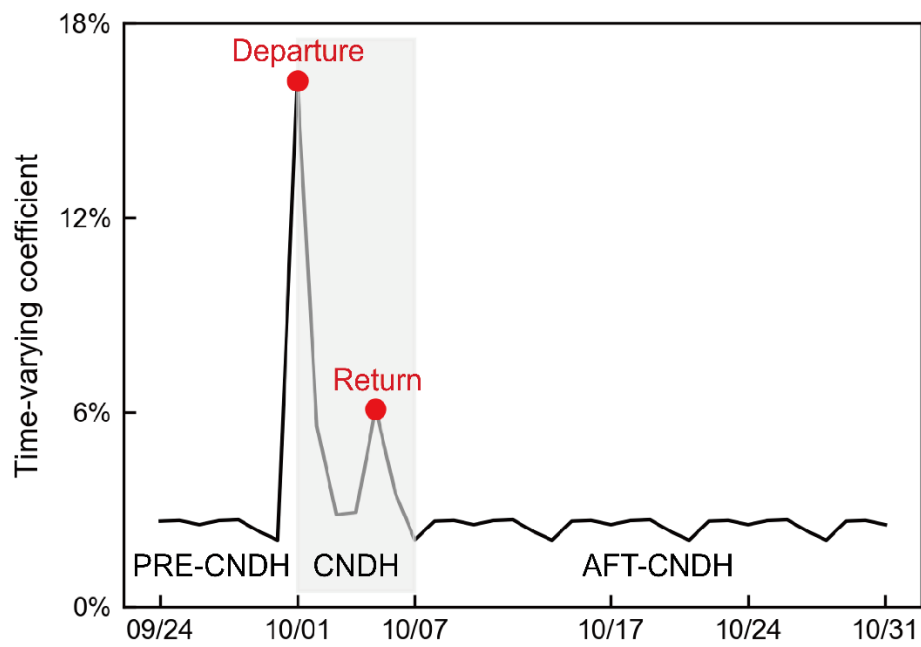

**Figure S6** Time-varying coefficient of traffic flow during the PRE-CNDH, CNDH and AFT-CNDH.

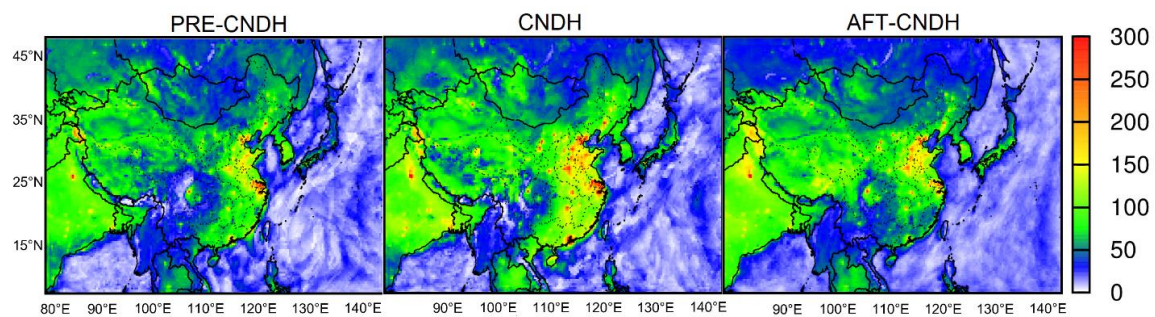

**Figure S7** Predicted MDA8 O<sub>3</sub> production rates in PRE-CNDH, CNDH and AFT-CNDH, respectively. Units are ppb h<sup>-1</sup>.



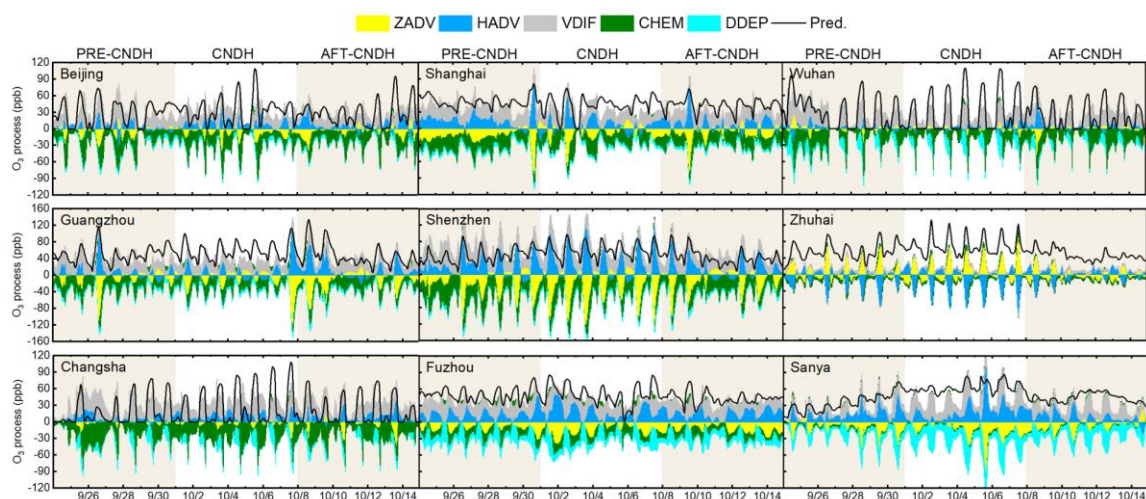

**Figure S8** O<sub>3</sub> process analysis in nine key cities during the CNDH in 2018.

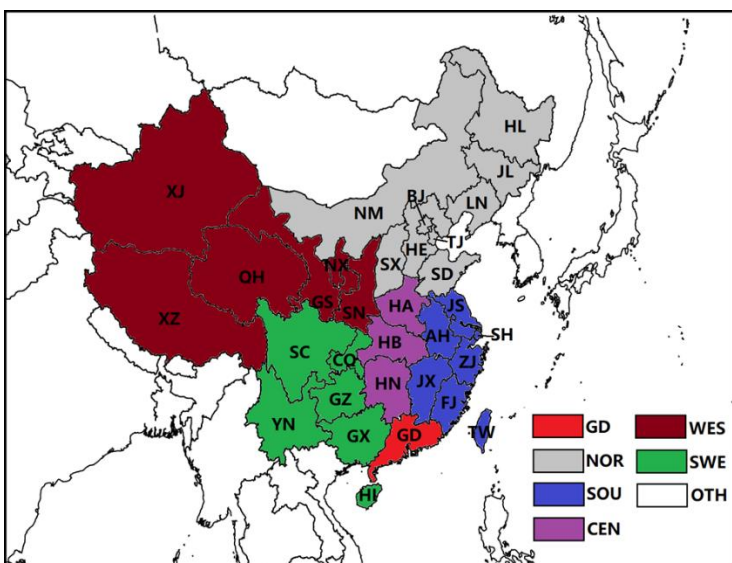

**Figure S9** The categories of regional source sectors for the PRD simulations. Regions in same color are defined as the same region group. The regional categories are: GD: Guangdong (including Guangdong province); NOR: northern part (including the BTH and the northeast); SOU: Southern part (mainly including the YRD); CEN: central part (including Hunan, Hubei, and Henan provinces); WES: western part (mainly including Shaanxi, Gansu, and Xinjiang

provinces); SWE: (southeast part mainly including Sichuan, Yunnan and Guangxi provinces);

OTH: Other countries. The full names of the provinces are listed in **Table S7**.

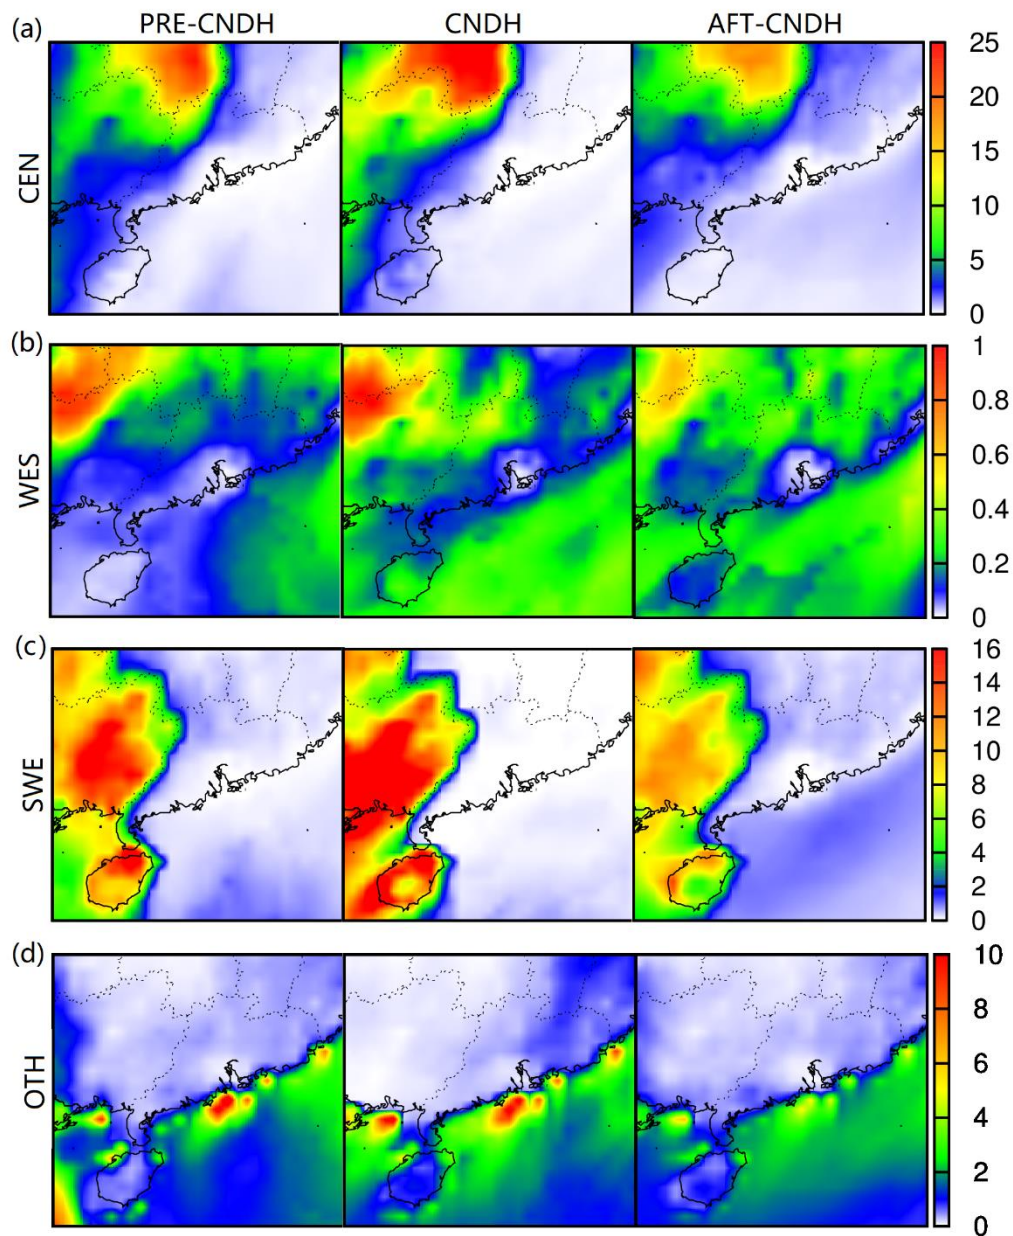

**Figure S10** The same figure as Figure 4 (a) but from other sectors to the non-background  $O_3$  in the PRD.



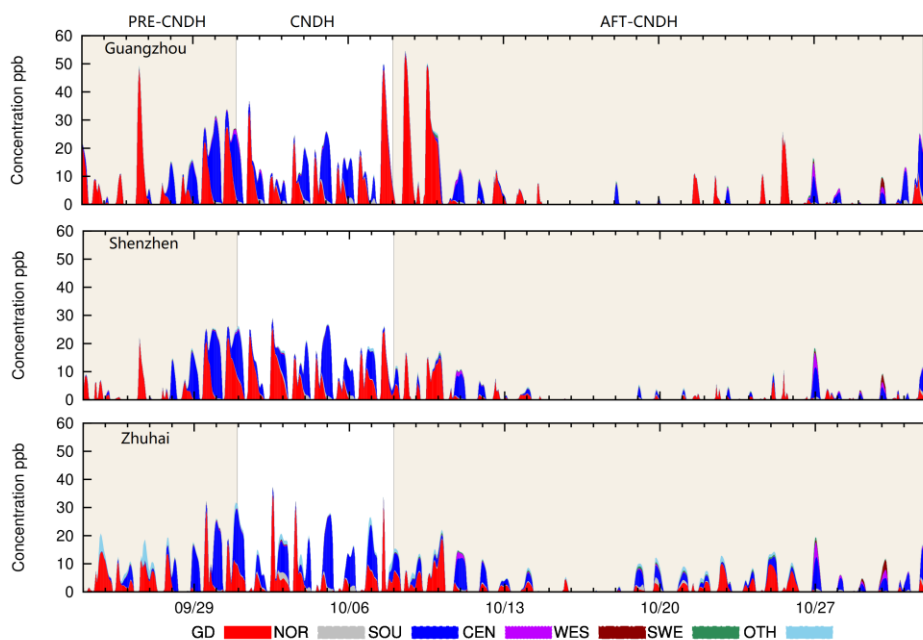

**Figure S11** Hourly variations of the contributions of the source regions to  $O_3\_NO_x$  in the PRD key cities (Guangzhou, Shenzhen, and Zhuhai).

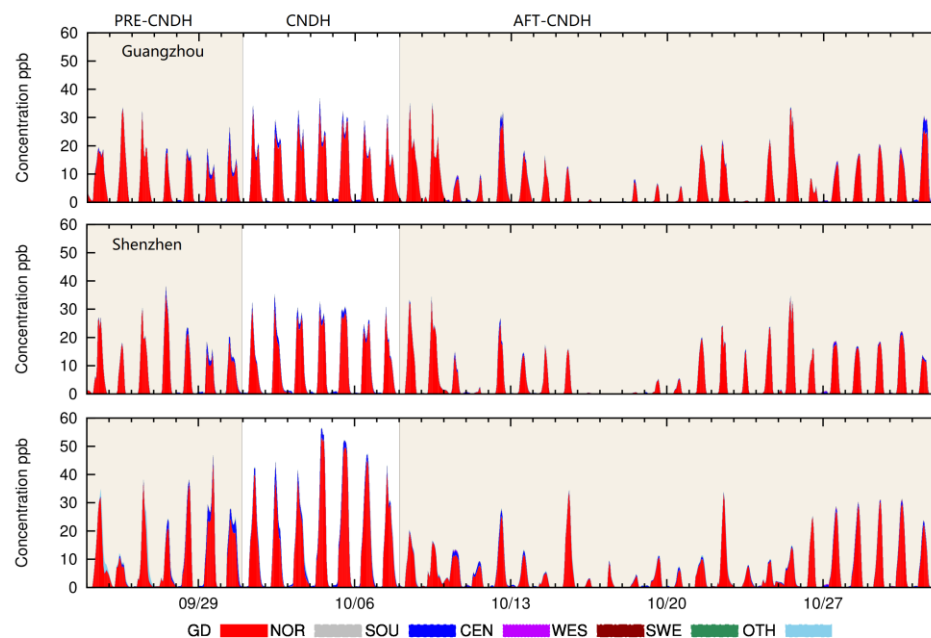

**Figure S12** Hourly variations of the contributions of the source regions to  $O_3\_VOC$  in the PRD key cities (Guangzhou, Shenzhen, and Zhuhai).

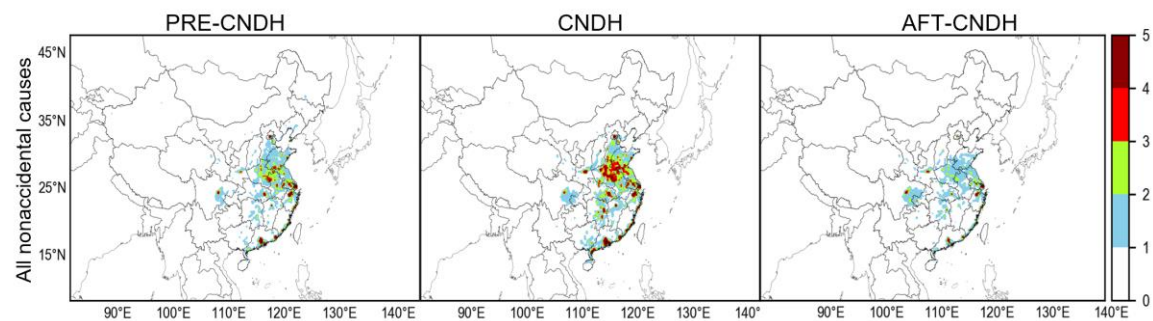

**Figure S11** Daily mortality from all non-accidental causes due to O<sub>3</sub> during the PRE-CNDH, CNDH and AFT-CNDH in China.

**Table S1** Emission profiles of major anthropogenic sectors in September and October.

|                    | Industry | Residential | Transportation | Power |
|--------------------|----------|-------------|----------------|-------|
| Ratio <sup>*</sup> | 0.98     | 0.82        | 1              | 1     |

<sup>\*</sup>: Ratio = emissions in September / emissions in October

**Table S2** Seven physical and chemical processes given by the IPR analysis.

| Process                                     | Abbreviation |
|---------------------------------------------|--------------|
| Horizontal advection                        | HADV         |
| Vertical advection                          | ZADV         |
| Vertical diffusion                          | VDIF         |
| Emissions contribution                      | EMIS         |
| Dry deposition                              | DDEP         |
| Aerosol processes                           | AERO         |
| Net sum of all gas-phase chemical processes | CHEM         |

**Table S3** MDA8 O<sub>3</sub> concentrations in PRE-CNDH, CNDH and AFT-CNDH in the 43 cities. The 9 key cities are shown in bold. SC, EC, NC, WC represent South China, East China, North China and West China.

| City         | PRE-CNDH | CNDH | AFT-CNDH | Max-CNDH* | Exc-CNDH* | Region | Location        |
|--------------|----------|------|----------|-----------|-----------|--------|-----------------|
| Guangzhou    | 50.6     | 76.8 | 41.1     | 83.2      | 5         | SC     | 113.3°E, 23.1°N |
| Shenzhen     | 52.3     | 82.7 | 47.1     | 92.3      | 6         |        | 114.1°E, 22.6°N |
| Zhuhai       | 65.2     | 97.8 | 58.6     | 107.0     | 7         |        | 113.6°E, 22.3°N |
| Changsha     | 47.5     | 80.8 | 42.6     | 99.8      | 5         |        | 112.9°E, 28.2°N |
| Sanya        | 33.5     | 73.5 | 41.9     | 85.9      | 4         |        | 109.5°E, 18.3°N |
| Shanghai     | 58.3     | 63.2 | 48.7     | 87.0      | 1         | EC     | 121.5°E, 31.2°N |
| Wuhan        | 56.6     | 73.6 | 42.8     | 88.5      | 4         |        | 114.3°E, 30.6°N |
| Fuzhou       | 56.4     | 70.1 | 49.1     | 81.9      | 2         |        | 119.3°E, 26.1°N |
| Beijing      | 35.7     | 41.3 | 30.5     | 58.1      | 0         | NC     | 116.4°E, 39.9°N |
| Foshan       | 55.7     | 85.1 | 42.9     | 97.8      | 7         | SC     | 113.1°E, 23.0°N |
| Haikou       | 37.9     | 78.8 | 43.6     | 89.4      | 5         |        | 110.3°E, 20.0°N |
| Nanning      | 34.3     | 69.0 | 27.4     | 82.1      | 1         |        | 108.4°E, 22.8°N |
| Dongguan     | 54.9     | 72.9 | 47.2     | 77.5      | 1         |        | 113.8°E, 23.1°N |
| Zhangjiajie  | 46.4     | 53.2 | 40.3     | 71.4      | 0         |        | 110.5°E, 29.1°N |
| Dalizhou     | 28.2     | 32.5 | 31.1     | 38.6      | 0         |        | 100.2°E, 25.6°N |
| Lijiang      | 22.3     | 30.0 | 31.2     | 36.6      | 0         |        | 100.2°E, 26.9°N |
| Kunming      | 22.1     | 27.7 | 25.7     | 35.6      | 0         |        | 102.7°E, 25.1°N |
| Hefei        | 62.7     | 74.9 | 44.3     | 103.1     | 3         | EC     | 117.3°E, 31.8°N |
| Nanjing      | 60.3     | 72.6 | 47.5     | 97.1      | 2         |        | 118.8°E, 32.1°N |
| Suzhou       | 56.6     | 65.7 | 44.3     | 91.1      | 2         |        | 120.6°E, 31.3°N |
| Nanchang     | 60.7     | 78.1 | 42.5     | 87.2      | 5         |        | 115.9°E, 28.7°N |
| Hangzhou     | 61.8     | 72.3 | 44.2     | 84.5      | 3         |        | 120.2°E, 30.3°N |
| Xiamen       | 55.9     | 65.6 | 50.0     | 72.5      | 0         |        | 118.1°E, 24.5°N |
| Yinchuan     | 44.6     | 43.1 | 40.1     | 57.0      | 0         | WC     | 106.3°E, 38.5°N |
| Guiyang      | 32.6     | 35.6 | 26.8     | 50.5      | 0         |        | 106.6°E, 26.7°N |
| Lasa         | 39.9     | 46.9 | 43.1     | 49.7      | 0         |        | 91.1°E, 29.7°N  |
| Xi'an        | 31.7     | 38.3 | 31.6     | 49.7      | 0         |        | 108.9°E, 34.3°N |
| Lanzhou      | 38.6     | 41.5 | 34.0     | 49.4      | 0         |        | 103.8°E, 36.1°N |
| Urumqi       | 33.2     | 33.9 | 24.2     | 47.2      | 0         |        | 87.6°E, 43.8°N  |
| Xining       | 39.5     | 41.4 | 33.2     | 45.0      | 0         |        | 101.8°E, 36.6°N |
| Chengdu      | 34.0     | 25.7 | 25.4     | 32.5      | 0         |        | 104.1°E, 30.7°N |
| Chongqing    | 18.0     | 14.1 | 15.5     | 17.7      | 0         |        | 106.6°E, 29.6°N |
| Jinan        | 53.3     | 58.1 | 43.1     | 95.3      | 2         | NC     | 117.0°E, 36.7°N |
| Tianjin      | 40.7     | 50.4 | 36.3     | 85.0      | 2         |        | 117.2°E, 39.1°N |
| Zhengzhou    | 48.0     | 58.9 | 40.6     | 79.6      | 2         |        | 113.6°E, 34.8°N |
| Shijiazhuang | 40.3     | 50.6 | 33.3     | 72.6      | 0         |        | 114.5°E, 38.1°N |
| Qingdao      | 48.6     | 54.1 | 42.8     | 70.0      | 0         |        | 120.4°E, 36.1°N |
| Dalian       | 52.5     | 50.4 | 43.5     | 66.7      | 0         |        | 121.6°E, 38.9°N |
| Taiyuan      | 40.2     | 44.3 | 33.2     | 64.8      | 0         |        | 112.6°E, 37.9°N |
| Shenyang     | 28.7     | 36.9 | 31.1     | 50.7      | 0         |        | 123.4°E, 41.8°N |
| Haerbin      | 27.4     | 33.9 | 27.2     | 50.6      | 0         |        | 126.6°E, 45.8°N |
| Hohhot       | 30.6     | 33.3 | 32.6     | 47.0      | 0         |        | 111.7°E, 40.8°N |
| Changchun    | 23.4     | 29.7 | 25.9     | 41.8      | 0         |        | 125.3°E, 43.9°N |

\*: Max-CNDH is the maximum MDA8 O<sub>3</sub> and Exc-CNDH refers to days exceeding the air quality standard during CNDH.



**Table S4** Meteorological WRF mode performance in the simulation period (Sep. 24 to Oct. 31, 2018). T2: temperature, WS: wind speed, WD: wind direction, RH: relative humidity.

|                         |      |       | Benchmark*     |
|-------------------------|------|-------|----------------|
| T2 (K)                  | OBS  | 286.5 |                |
|                         | PRE  | 286.1 |                |
|                         | MB   | -0.4  | $\leq \pm 0.5$ |
|                         | GE   | 2.5   | $\leq 2.0$     |
|                         | RMSE | 3.3   |                |
| WS (m s <sup>-1</sup> ) | OBS  | 3.4   |                |
|                         | PRE  | 3.9   |                |
|                         | MB   | 0.5   | $\leq \pm 0.5$ |
|                         | GE   | 1.5   | $\leq 2.0$     |
|                         | RMSE | 1.9   | $\leq 2.0$     |
| WD (°)                  | OBS  | 178.2 |                |
|                         | PRE  | 174.0 |                |
|                         | MB   | -4.2  | $\leq \pm 10$  |
|                         | GE   | 43.8  | $\leq \pm 30$  |
|                         | RMSE | 60.6  |                |
| RH (%)                  | OBS  | 69.6  |                |
|                         | PRE  | 70.2  |                |
|                         | MB   | 0.6   |                |
|                         | GE   | 12.9  |                |
|                         | RMSE | 16.5  |                |

\*: suggested by Emery et al. (2001)

**Table S5** CMAQ model performances of key pollutants in the simulation period (Sep. 24 to Oct. 31, 2018).

|                                         |     |       | Criteria* |
|-----------------------------------------|-----|-------|-----------|
| O <sub>3</sub> -1h (ppb)                | OBS | 53.71 |           |
|                                         | PRE | 50.60 |           |
|                                         | MFB | -0.16 |           |
|                                         | MFE | 0.32  |           |
|                                         | MNB | -0.07 | ≤±0.15    |
|                                         | MNE | 0.26  | ≤0.3      |
| NO <sub>2</sub> (ppb)                   | OBS | 15.44 |           |
|                                         | PRE | 12.66 |           |
|                                         | MFB | -0.39 |           |
|                                         | MFE | 0.74  |           |
|                                         | MNB | -0.02 |           |
|                                         | MNE | 0.71  |           |
| CO (ppm)                                | OBS | 0.59  |           |
|                                         | PRE | 0.33  |           |
|                                         | MFB | -0.60 |           |
|                                         | MFE | 0.72  |           |
|                                         | MNB | -0.35 |           |
|                                         | MNE | 0.54  |           |
| PM <sub>2.5</sub> (μg m <sup>-3</sup> ) | OBS | 38.80 |           |
|                                         | PRE | 32.13 |           |
|                                         | MFB | -0.04 | ≤±0.6     |
|                                         | MFE | 0.59  | ≤0.75     |
|                                         | MNB | 0.17  |           |
|                                         | MNE | 0.70  |           |

\*: suggested by (EPA, 2005, 2007)

**Table S6** Daily  $y_0$  and  $\beta$  values for all non-accidental causes, cardiovascular diseases (CVD), respiratory diseases (RD), hypertension, stroke and chronic obstructive pulmonary disease (COPD).

| Disease                   | Daily $y_0$            | $\beta$ (%) |
|---------------------------|------------------------|-------------|
| All non-accidental causes | $1.687 \times 10^{-5}$ | 0.24        |
| CVD                       | $3.880 \times 10^{-6}$ | 0.27        |
| RD                        | $1.841 \times 10^{-6}$ | 0.18        |
| Hypertension              | $5.422 \times 10^{-7}$ | 0.60        |
| Stroke                    | $1.197 \times 10^{-7}$ | 0.29        |
| COPD                      | $1.623 \times 10^{-6}$ | 0.20        |

**Table S7** Province names and their abbreviations

| Province       | Abbreviation | Province  | Abbreviation |
|----------------|--------------|-----------|--------------|
| Beijing        | BJ           | Henan     | HA           |
| Tianjin        | TJ           | Hubei     | HB           |
| Hebei          | HE           | Hunan     | HN           |
| Shanxi         | SX           | Guangdong | GD           |
| Inner Mongolia | NM           | Guangxi   | GX           |
| Liaoning       | LN           | Hainan    | HI           |
| Jilin          | JL           | Chongqing | CQ           |
| Heilongjiang   | HL           | Sichuan   | SC           |
| Shanghai       | SH           | Guizhou   | GZ           |
| Jiangsu        | JS           | Yunnan    | YN           |
| Zhejiang       | ZJ           | Xizang    | XZ           |
| Anhui          | AH           | Shaanxi   | SN           |
| Fujian         | FJ           | Gansu     | GS           |
| Jiangxi        | JX           | Qinghai   | QH           |
| Shandong       | SD           | Ningxia   | NX           |
| Henan          | HA           | Xinjiang  | XJ           |
| Hubei          | HB           | Taiwan    | TW           |

**References:**

Emery, C., Tai, E., and Yarwood, G.: Enhanced meteorological modeling and performance evaluation for two Texas ozone episodes, Prepared for the Texas natural resource conservation commission, by ENVIRON International Corporation, 2001.

EPA, U.: Guidance on the Use of Models and Other Analyses in Attainment Demonstrations for the 8-hour Ozone NAAQS, EPA-454/R-05-002, 2005.

EPA, U.: Guidance on the use of models and other analyses for demonstrating attainment of air quality goals for ozone, PM<sub>2.5</sub>, and regional haze, US Environmental Protection Agency, Office of Air Quality Planning and Standards, 2007.
